# Supplementary material
Source: PubMed Central journal article supplement (PMC11071710)

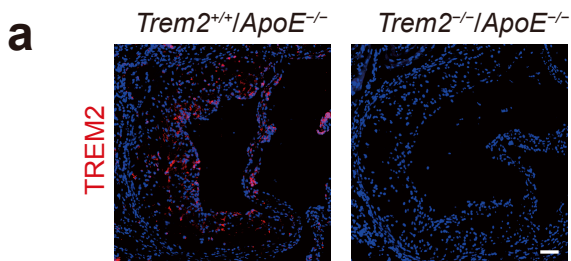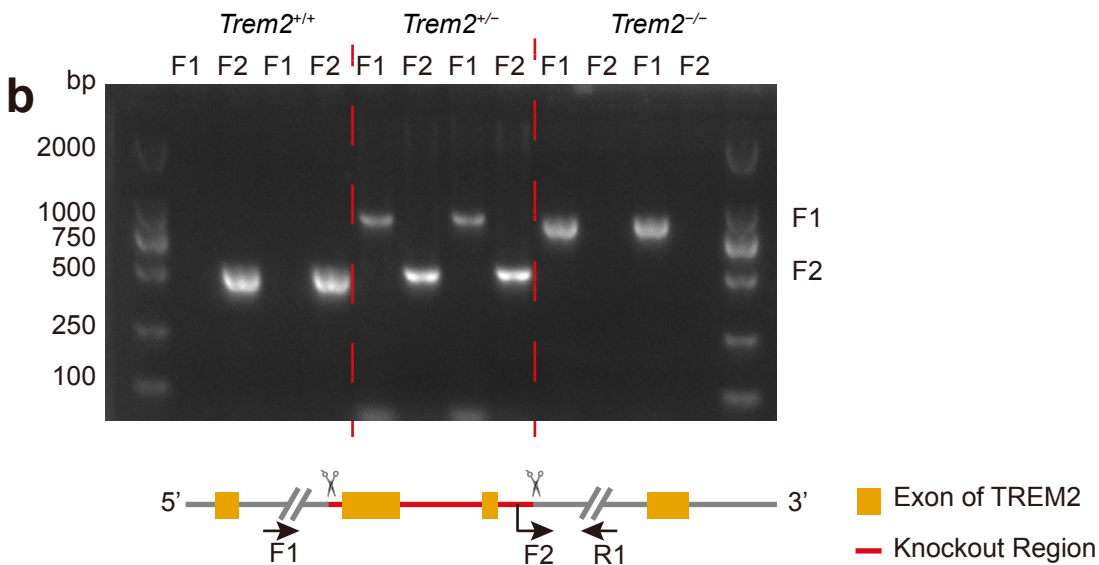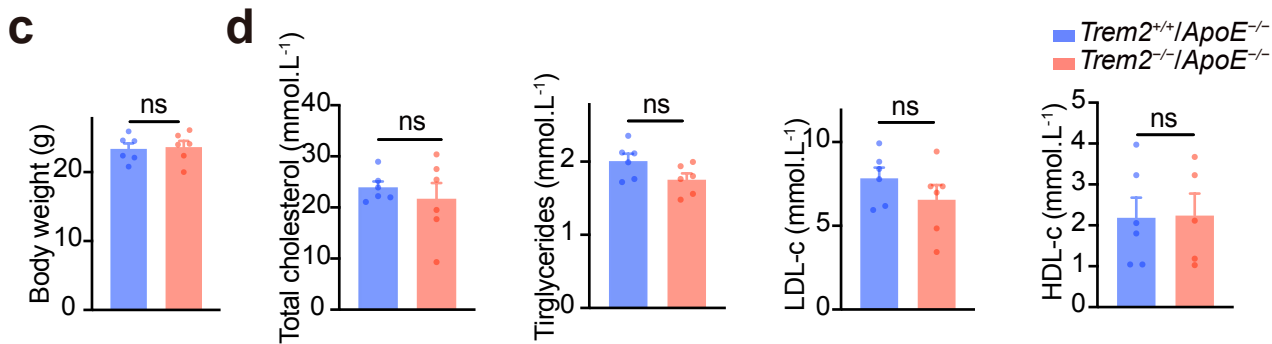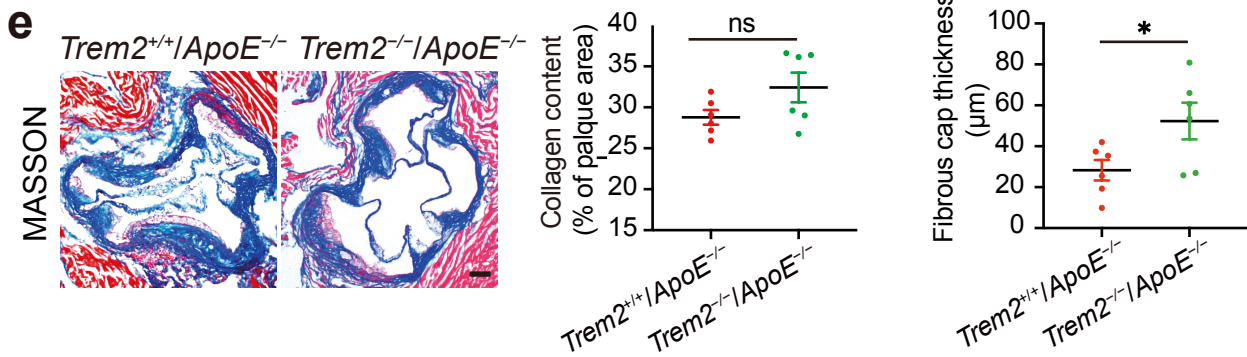

Supplement: 18_2023_4786_MOESM1_ESM.pdf [file 18_2023_4786_MOESM1_ESM.pdf]

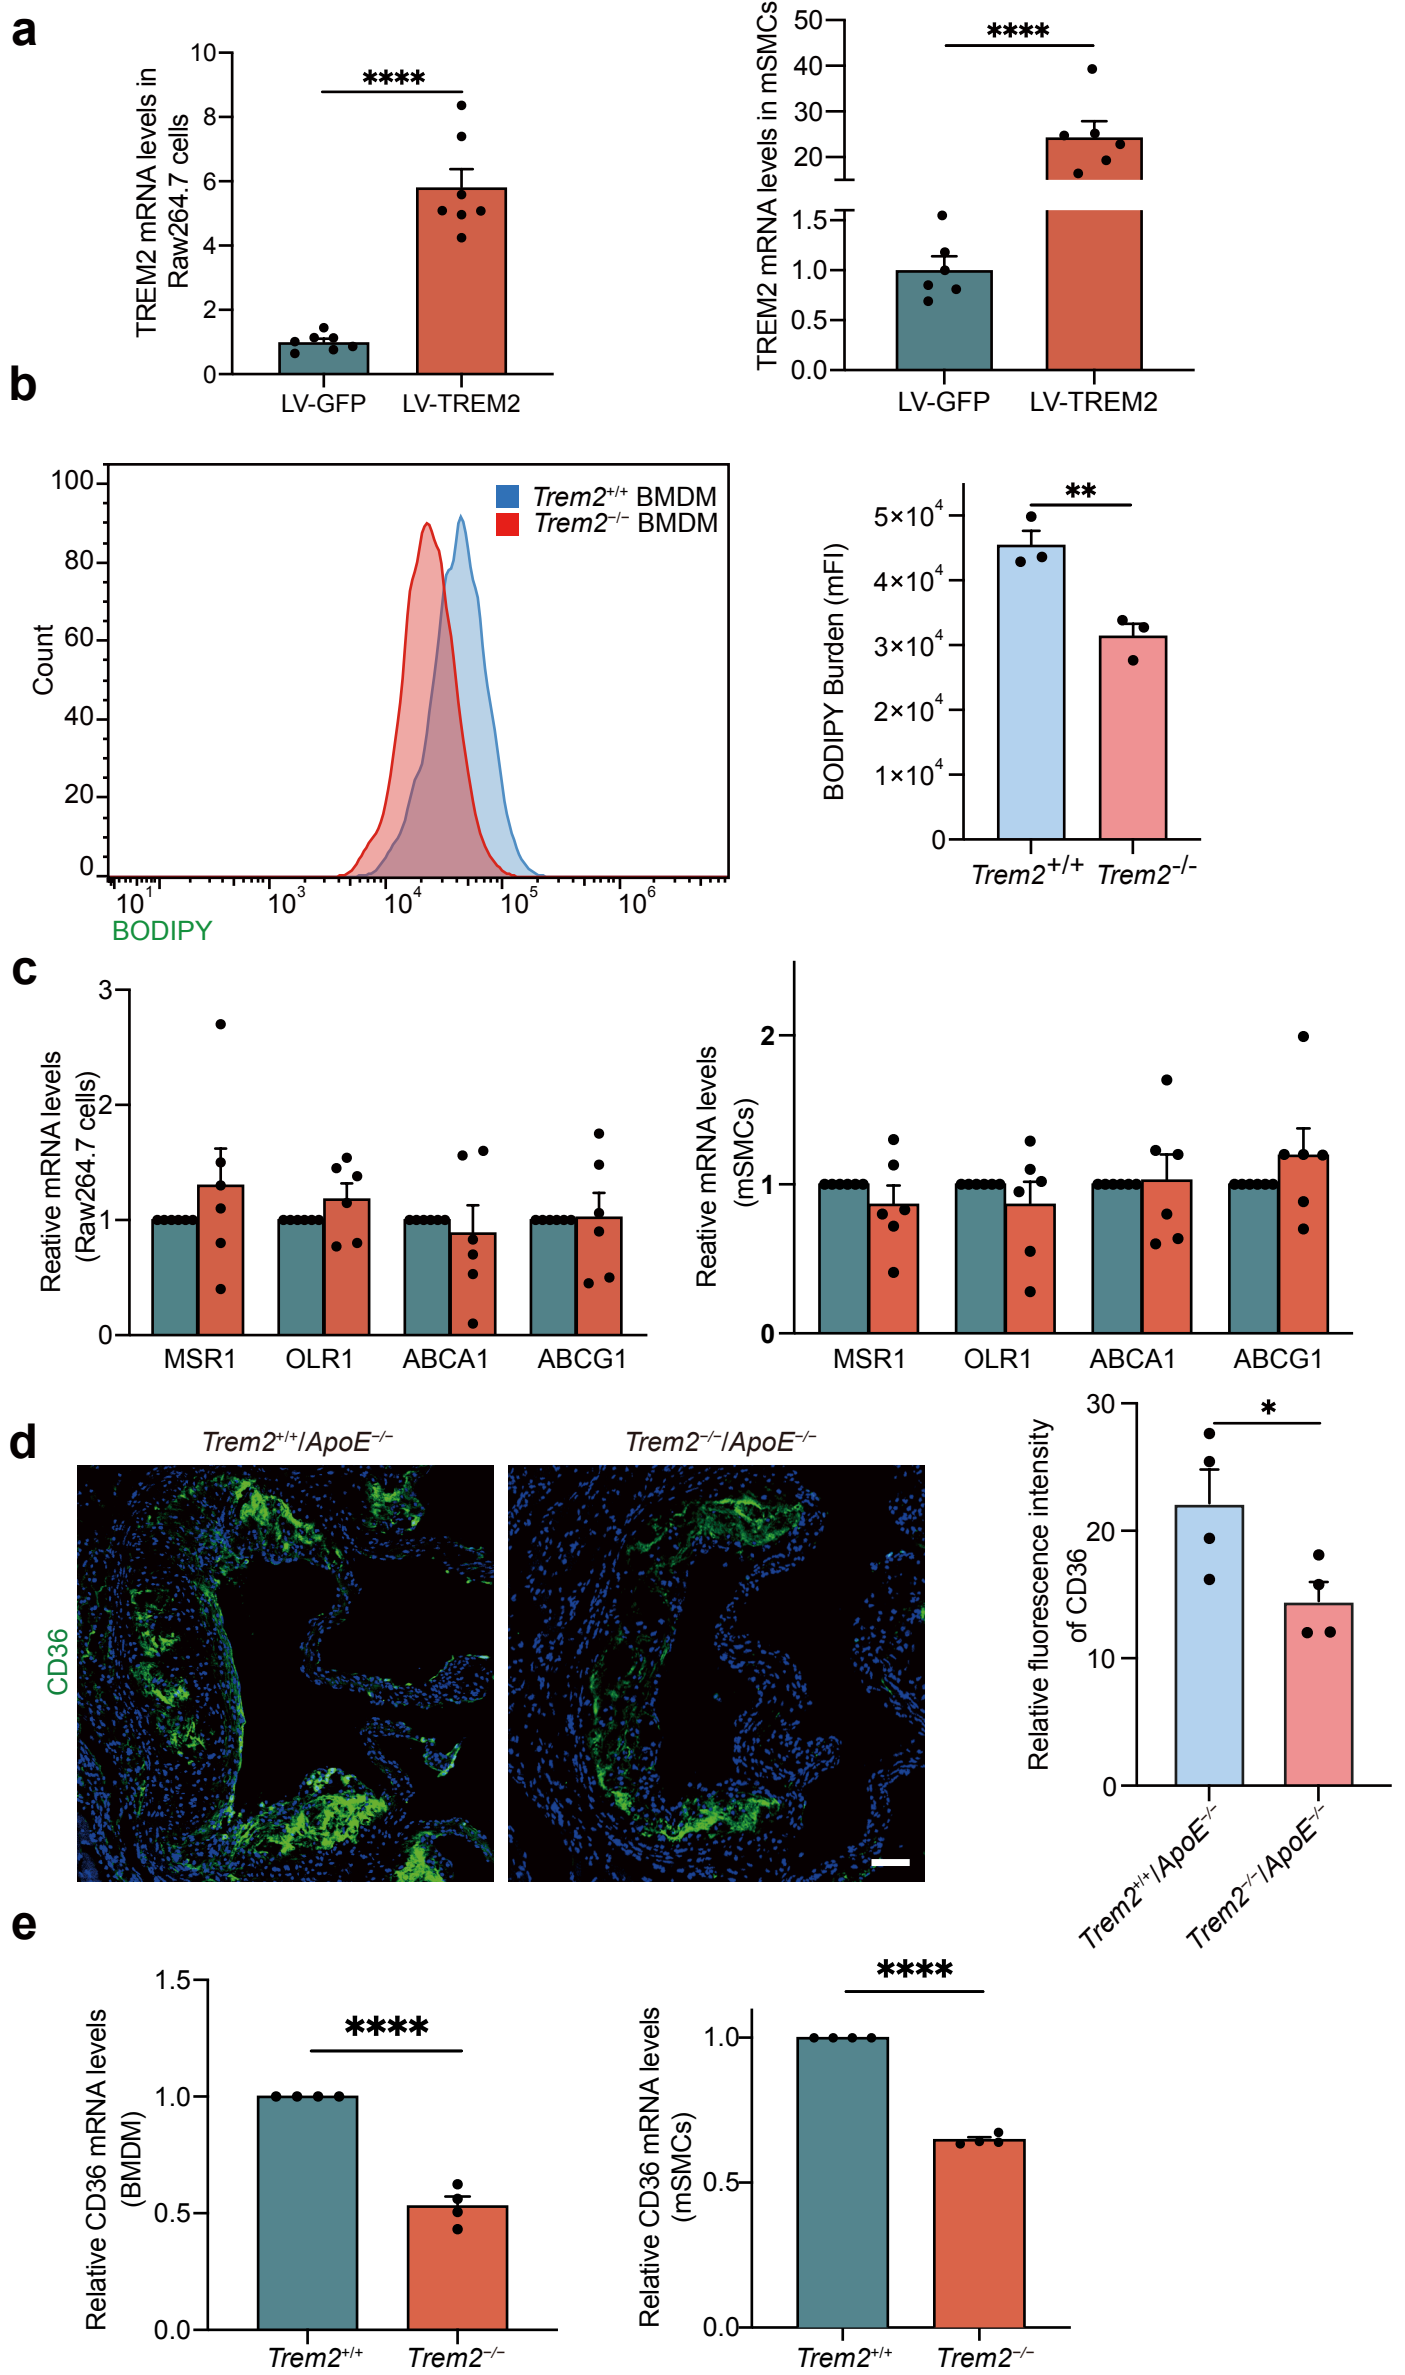

Supplement: 18_2023_4786_MOESM2_ESM.pdf [file 18_2023_4786_MOESM2_ESM.pdf]

**a**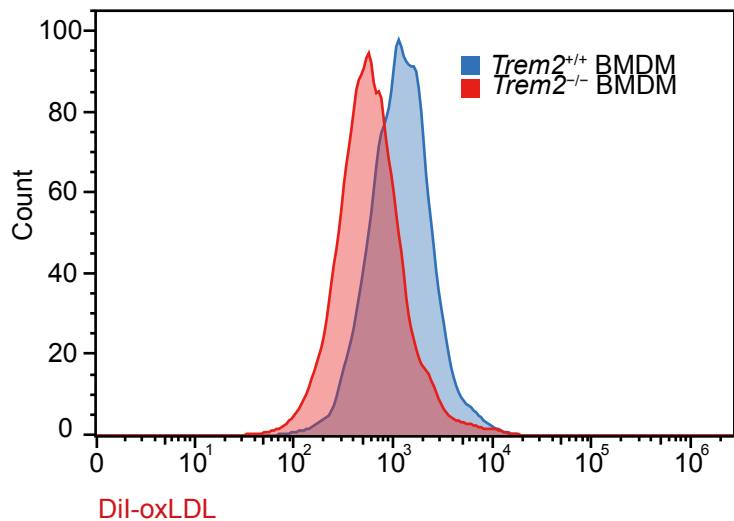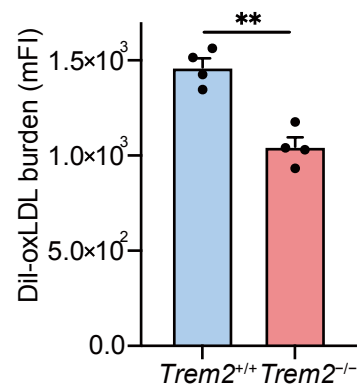**b**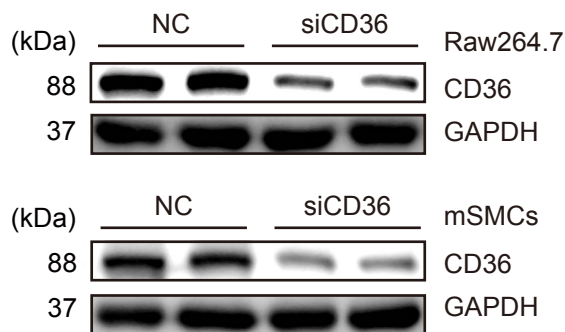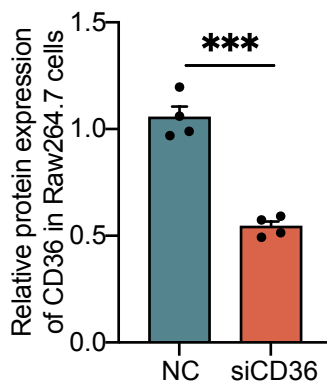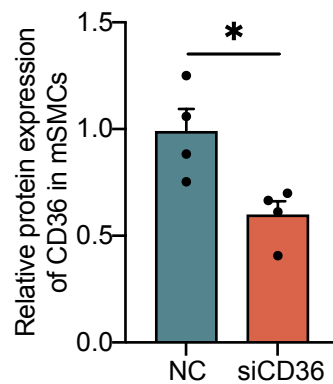**c**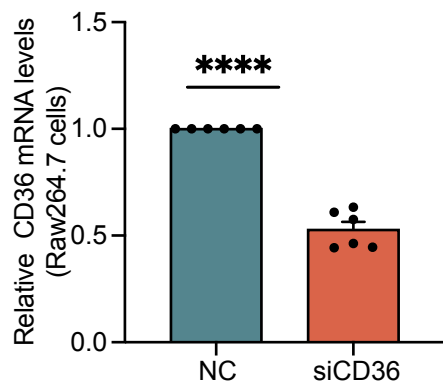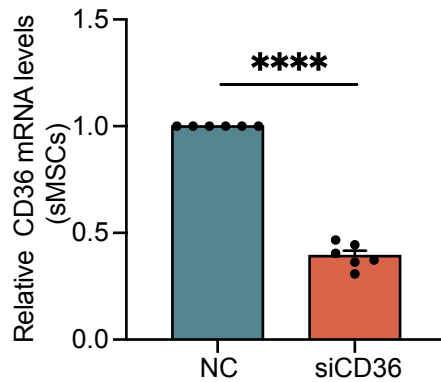

Supplement: 18_2023_4786_MOESM3_ESM.pdf [file 18_2023_4786_MOESM3_ESM.pdf]
